# Supplementary material
Source: PubMed Central journal article supplement (PMC2688996)
Supplement: 0901389106_ST1_PDF.pdf [file 0901389106_ST1_PDF.pdf]

**Table S1.** The incidence of *Myzus persicae* densovirus (MpDENV) transcripts in EST of *Myzus persicae*\*.

| Accession No. | EST size as a percentage of MpDENV genome size | E-value   | Maximum identity | Winged morph specifically mentioned as an RNA source |
|---------------|------------------------------------------------|-----------|------------------|------------------------------------------------------|
| EE571584.1    | 16%                                            | 0         | 97%              |                                                      |
| EC387330.1    | 14%                                            | 0         | 97%              | winged adult                                         |
| EC387519.1    | 14%                                            | 0         | 97%              | winged adult                                         |
| EC387312.1    | 14%                                            | 0         | 98%              | winged adult                                         |
| EC387620.1    | 14%                                            | 0         | 97%              | winged adult                                         |
| EC387332.1    | 15%                                            | 0         | 100%             | winged adult                                         |
| EC387259.1    | 13%                                            | 0         | 97%              | winged adult                                         |
| EC387559.1    | 12%                                            | 0         | 97%              | winged adult                                         |
| ES226838.1    | 12%                                            | 0         | 97%              |                                                      |
| DW012927.1    | 12%                                            | 0         | 100%             |                                                      |
| EC387110.1    | 12%                                            | 0         | 96%              | winged adult                                         |
| ES223830.1    | 10%                                            | 0         | 98%              | winged adult                                         |
| ES223196.1    | 11%                                            | 0         | 97%              | winged adult                                         |
| EC387269.1    | 15%                                            | 0         | 96%              | winged adult                                         |
| EC387740.1    | 10%                                            | 0         | 96%              | winged adult                                         |
| EC387651.1    | 10%                                            | 0         | 96%              | winged adult                                         |
| EC387277.1    | 15%                                            | 0         | 96%              | winged adult                                         |
| ES226611.1    | 11%                                            | 0         | 99%              |                                                      |
| ES223280.1    | 10%                                            | 0         | 97%              | winged adult                                         |
| ES225353.1    | 8%                                             | 0         | 97%              |                                                      |
| DW012144.1    | 13%                                            | 0         | 97%              |                                                      |
| ES219127.1    | 7%                                             | 0         | 98%              | winged adult                                         |
| EE571893.1    | 7%                                             | 0         | 98%              |                                                      |
| EC387299.1    | 11%                                            | 9.00E-169 | 98%              | winged adult                                         |
| EC387362.1    | 10%                                            | 4.00E-157 | 97%              | winged adult                                         |
| EE265097.1    | 5%                                             | 7.00E-155 | 97%              |                                                      |
| EC390477.1    | 10%                                            | 7.00E-150 | 97%              |                                                      |
| DW013895.1    | 10%                                            | 7.00E-145 | 97%              |                                                      |
| EC387126.1    | 5%                                             | 1.00E-137 | 98%              | winged adult                                         |
| ES220067.1    | 9%                                             | 6.00E-126 | 97%              | winged adult                                         |
| EC387726.1    | 4%                                             | 2.00E-125 | 96%              | winged adult                                         |
| EC387652.1    | 8%                                             | 2.00E-125 | 97%              | winged adult                                         |
| EC387612.1    | 6%                                             | 3.00E-123 | 98%              | winged adult                                         |
| EC387059.1    | 8%                                             | 4.00E-122 | 97%              | winged adult                                         |
| EC387710.1    | 5%                                             | 6.00E-121 | 96%              | winged adult                                         |
| EC387759.1    | 5%                                             | 3.00E-119 | 98%              | winged adult                                         |
| ES226797.1    | 4%                                             | 4.00E-117 | 98%              |                                                      |
| EC387567.1    | 3%                                             | 3.00E-84  | 95%              | winged adult                                         |

\* This search was carried out using nucleotide blast with the *Myzus persicae* densovirus (MpDENV) genome sequence (Gene Bank Accession Number: NC\_005040) as a query sequence in Aphidinae expressed sequence tags (EST) database (133076 entries in total). All matches were found only in ESTs from *Myzus persicae*, parthenogenetic females. Only sequences producing significant alignments are shown.
