# Supplementary material
Source: PubMed Central journal article supplement (PMC2688996)
Supplement: 0901389106_ST2_PDF.pdf [file 0901389106_ST2_PDF.pdf]

**Table S2.** The incidence of densovirus expressed sequence tags (ESTs) in the Aphidinae EST database\*.

| Accession No.           | Species            | E-value | Amino acid identity | Positions in DplDNV genome (nt) | Winged morph specifically mentioned as a source of RNA |
|-------------------------|--------------------|---------|---------------------|---------------------------------|--------------------------------------------------------|
| EC387312.1              | <i>M. persicae</i> | 1e-101  | 61%                 | 1599-2318                       | winged adult                                           |
| EX610113.1 <sup>†</sup> | <i>A. pisum</i>    | 4e-99   | 71%                 | 1740-2303                       | winged adult                                           |
| CV837559.1              | <i>A. pisum</i>    | 6e-75   | 63%                 | 1857-2303                       |                                                        |
| DY225272.1              | <i>A. pisum</i>    | 2e-72   | 79%                 | 1926-2337                       |                                                        |
| DY226431.1              | <i>A. pisum</i>    | 1e-70   | 74%                 | 1893-2315                       |                                                        |
| EC387332.1              | <i>M. persicae</i> | 2e-62   | 54%                 | 1524-1884                       | winged adult                                           |
| EE571893.1              | <i>M. persicae</i> | 2e-59   | 74%                 | 1893-2315                       |                                                        |
| ES219127.1              | <i>M. persicae</i> | 2e-40   | 59%                 | 3790-3368                       | winged adult                                           |
| ES223830.1              | <i>M. persicae</i> | 9e-40   | 61%                 | 3790-3497                       | winged adult                                           |
| DW012927.1              | <i>M. persicae</i> | 1e-38   | 46%                 | 1524-1886                       |                                                        |
| DY224681.1              | <i>A. pisum</i>    | 3e-33   | 44%                 | 1503-1859                       |                                                        |
| EE265097.1              | <i>M. persicae</i> | 2e-32   | 66%                 | 2061-2318                       |                                                        |
| EE571584.1              | <i>M. persicae</i> | 4e-21   | 41%                 | 2854-2654                       |                                                        |
| EC387620.1              | <i>M. persicae</i> | 5e-21   | 41%                 | 2854-2654                       | winged adult                                           |
| EX607716.1              | <i>A. pisum</i>    | 2e-18   | 85%                 | 1923-2048                       | winged adult                                           |
| EC387330.1              | <i>M. persicae</i> | 2e-18   | 41%                 | 2854-2654                       | winged adult                                           |
| EC387519.1              | <i>M. persicae</i> | 4e-18   | 41%                 | 2854-2654                       | winged adult                                           |
| ES226611.1              | <i>M. persicae</i> | 8e-18   | 31%                 | 834-1238                        |                                                        |
| EC387126.1              | <i>M. persicae</i> | 3e-17   | 57%                 | 3589-3326                       | winged adult                                           |
| DY224604.1              | <i>A. pisum</i>    | 3e-17   | 43%                 | 2917-2654                       |                                                        |
| DY223558.1              | <i>A. pisum</i>    | 3e-17   | 43%                 | 2917-2654                       |                                                        |
| EX644728.1              | <i>A. pisum</i>    | 4e-16   | 84%                 | 1932-2048                       | winged adult                                           |
| ES226797.1              | <i>M. persicae</i> | 4e-16   | 58%                 | 2130-2318                       |                                                        |
| ES226838.1              | <i>M. persicae</i> | 8e-16   | 42%                 | 3223-3062                       |                                                        |
| EX643327.1              | <i>A. pisum</i>    | 4e-14   | 45%                 | 1023-1253                       | winged adult                                           |
| EX607001.1              | <i>A. pisum</i>    | 9e-13   | 48%                 | 1023-1220                       | winged adult                                           |
| EC387277.1              | <i>M. persicae</i> | 1e-10   | 41%                 | 2854-2654                       | winged adult                                           |
| EC387269.1              | <i>M. persicae</i> | 1e-10   | 41%                 | 2854-2654                       | winged adult                                           |
| EC387259.1              | <i>M. persicae</i> | 1e-10   | 41%                 | 2854-2654                       | winged adult                                           |
| EC387110.1              | <i>M. persicae</i> | 1e-10   | 41%                 | 2854-2654                       | winged adult                                           |
| DW012144.1              | <i>M. persicae</i> | 3e-09   | 51%                 | 2788-2654                       |                                                        |
| ES223280.1              | <i>M. persicae</i> | 4e-09   | 38%                 | 2854-2705                       | winged adult                                           |
| ES225353.1              | <i>M. persicae</i> | 4e-05   | 47%                 | 2761-2651                       |                                                        |
| DV748353.1              | <i>A. pisum</i>    | 5e-05   | 44%                 | 1023-1103                       |                                                        |
| CV848413.1              | <i>A. pisum</i>    | 1e-04   | 93%                 | 1369-1413                       |                                                        |
| EX608942.1              | <i>A. pisum</i>    | 2e-04   | 45%                 | 1023-1121                       | winged adult                                           |

\*The search was carried out using TBLASTX web-based tool in 133076 entries of Aphidinae EST database. Genomic sequence of *Dysaphis plantaginea* densovirus, isolate WS-2002 (Gene Bank Accession Number EU851411) was used as the query sequence. Matches were found in ESTs from *Myzus persicae* and *Acyrtosiphon pisum* parthenogenetic females. Only sequences producing significant alignments are shown.

<sup>†</sup> Nucleotide and amino acid sequence alignments of the EST Gene Bank Accession Number EX610113 from winged parthenogenetic female of *A. pisum* with the DplDNV and MpDNV sequences are presented in Fig. S3.
