# Supplementary material
Source: PubMed Central journal article supplement (PMC2688996)
Supplement: 0901389106_ST3_PDF.pdf [file 0901389106_ST3_PDF.pdf]

**Table S3.** Analysis of the accumulation of DpIDNV DNA and RAAV RNA in individual aphids from a colony of clone WS by real-time (RT) PCR\*.

| Aphid No | Appearance          | DpIDNV DNA (pg) | RAAV RNA (pg) |
|----------|---------------------|-----------------|---------------|
| 1        | Light, no wing buds | 0.55            | 22085.74      |
| 2        | Light, no wing buds | 1.02            | 25756.91      |
| 3        | Light, no wing buds | 5.62            | 5961.65       |
| 4        | Light, no wing buds | 0.91            | 25106.62      |
| 5        | Light, no wing buds | 4.47            | 6726.46       |
| 6        | Light, no wing buds | 9.61            | 37300.62      |
| 7        | Light, no wing buds | 2.14            | 15129.56      |
| 8        | Light, no wing buds | 1.44            | 10367.18      |
| 9        | Light, no wing buds | 0.46            | 5451.134      |
| 10       | Dark, wing buds     | 3074.91         | 3866.45       |
| 11       | Dark, wing buds     | 6973.47         | 14380.57      |
| 12       | Dark, wing buds     | 6000.21         | 14206.15      |
| 13       | Dark, wing buds     | 6832.63         | 6951.38       |
| 14       | Dark, wing buds     | 5876.16         | 25123.55      |
| 15       | Dark, wing buds     | 5119.56         | 15159.90      |
| 16       | Dark, wing buds     | 3049.94         | 6388.52       |
| 17       | Dark, wing buds     | 3207.49         | 13335.71      |
| 18       | Dark, wing buds     | 4487.90         | 11142.51      |
| 19       | Dark, wing buds     | 5539.70         | 20265.56      |
| 20       | Dark, wing buds     | 9387.08         | 22841.86      |
| 21       | Dark, wing buds     | 3667.82         | 15530.77      |
| 22       | Dark, wing buds     | 6386.37         | 10237.56      |
| 23       | Winged              | 7639.25         | 8689.754      |
| 24       | Winged              | 12867.88        | 13822.38      |
| 25       | Winged              | 16037.36        | 26914.58      |
| 26       | Winged              | 6516.14         | 7206.00       |
| 27       | Winged              | 12193.93        | 11495.32      |
| 28       | Winged              | 5796.93         | 35762.69      |
| 29       | Winged              | 6537.92         | 6468.78       |
| 30       | Winged              | 7554.85         | 26346.47      |
| 31       | Winged              | 6871.32         | 5872.91       |
| 32       | Winged              | 12381.44        | 10682.30      |
| 33       | Winged              | 11672.17        | 20616.05      |
| 34       | Winged              | 4300.71         | 14543.11      |
| 34       | Winged              | 6780.49         | 14806.50      |
| 36       | Winged              | 8490.49         | 18368.20      |
| 38       | Winged              | 9751.87         | 21653.44      |
| 39       | Winged              | 9820.60         | 7012.51       |

\* The colony was established using ten aphids from clone WS and was reared under long day conditions (16 h / 8 h light/dark at +20°C) on a plantain plant for three weeks prior to the sampling. The total RNA and DNA preparations were extracted from the light fifth instars without wing buds (light, no wings), dark fourth instars with wing buds (dark, wing buds) and winged fifth instars. The randomly primed cDNA to the total RNA samples were used in qPCR detection of RAAV RNA, the total DNA samples were used for qPCR detection of DpIDNV DNA.
