# Supplementary material
Source: PubMed Central journal article supplement (PMC2688996)
Supplement: 0901389106_ST4_PDF.pdf [file 0901389106_ST4_PDF.pdf]

**Table S4.** Vertical transmission of RAAV and DplDNV from parental females to the progeny nymphs reared on artificial diet \*.

| Parental aphids <sup>†</sup><br>(viruses) | Aphid<br>number | Nymph<br>number | Nymphs<br>per aphid | Clones established from individual progeny nymphs <sup>‡</sup> |        |      |                 |
|-------------------------------------------|-----------------|-----------------|---------------------|----------------------------------------------------------------|--------|------|-----------------|
|                                           |                 |                 |                     | Virus-free                                                     | DplDNV | RAAV | RAAV+<br>DplDNV |
| 2D (virus-free)                           | 10              | 35              | 3.5                 | 8                                                              | 0      | 0    | 0               |
| R3 (RAAV)                                 | 11              | 32              | 2.9                 | 9                                                              | 0      | 0    | 0               |
| WS (RAAV, high DplDNV)                    | 23              | 21              | 0.9                 | 1                                                              | 8      | 0    | 1               |
| WS (RAAV, low DplDNV)                     | 9               | 29              | 3.2                 | 7                                                              | 1      | 0    | 0               |

\* The parent female aphids were reared individually on artificial diet for 72 h and progeny nymphs removed every 12 h. The nymphs were transferred onto individual plantain plants to establish a colony.

<sup>†</sup> The presence of DplDNV DNA and RAAV RNA were tested by (RT) PCR in each parental aphid after nymph production.

<sup>‡</sup> DplDNV and RAAV infections were tested in the established lines after three weeks, 10 aphids were used to sample each clone.
