# Supplementary material
Source: PubMed Central journal article supplement (PMC2688996)
Supplement: 0901389106_ST6_PDF.pdf [file 0901389106_ST6_PDF.pdf]

**Table S6.** Development of wings in isolated aphids infected with DpIDNV\*.

| Aphid Number | Nymph origin | Wing buds | Wings | DpIDNV DNA in aphid (pg) <sup>†</sup> |
|--------------|--------------|-----------|-------|---------------------------------------|
| 1            | 2D           | -         | -     | not tested, insect died               |
| 2            | 2D           | -         | -     | not tested, insect died               |
| 3            | 2D           | -         | -     | Not detected                          |
| 4            | 2D           | -         | -     | Not detected                          |
| 5            | 2D           | -         | -     | Not detected                          |
| 6            | 2D           | -         | -     | Not detected                          |
| 7            | 2D           | -         | -     | Not detected                          |
| 8            | 2D           | -         | -     | Not detected                          |
| 9            | 2D           | -         | -     | Not detected                          |
| 10           | 2D           | -         | -     | Not detected                          |
| 11           | R3           | -         | -     | not tested, insect died               |
| 12           | R3           | -         | -     | Not detected                          |
| 13           | R3           | -         | -     | Not detected                          |
| 14           | R3           | -         | -     | Not detected                          |
| 15           | R3           | -         | -     | Not detected                          |
| 16           | R3           | -         | -     | Not detected                          |
| 17           | R3           | -         | -     | Not detected                          |
| 18           | R3           | -         | -     | Not detected                          |
| 19           | R3           | -         | -     | Not detected                          |
| 20           | R3           | -         | -     | Not detected                          |
| 21           | WS           | -         | -     | Not tested, insect died               |
| 22           | WS           | -         | -     | 3.17                                  |
| 23           | WS           | -         | -     | 4.88                                  |
| 24           | WS           | -         | -     | 0.17                                  |
| 25           | WS           | +         | -     | 94.90                                 |
| 26           | WS           | +         | -     | 393.67                                |
| 27           | WS           | +         | -     | 530.80                                |
| 28           | WS           | +         | -     | 739.20                                |
| 29           | WS           | -         | +     | 14486.39                              |
| 30           | WS           | -         | +     | 2481.95                               |
| 31           | 10A          | -         | -     | Not tested, insect died               |
| 32           | 10A          | -         | -     | Not tested, insect died               |
| 33           | 10A          | -         | -     | 0.89                                  |
| 34           | 10A          | -         | -     | 0.02                                  |
| 35           | 10A          | -         | -     | 0.97                                  |
| 36           | 10A          | -         | -     | 1.48                                  |
| 37           | 10A          | +         | -     | 1339.67                               |
| 38           | 10A          | -         | +     | 8849.05                               |
| 39           | 10A          | -         | +     | 10975.96                              |
| 40           | 10A          | -         | +     | 5201.68                               |

\* First instars of the rosy apple aphid were placed on individual detached leaves of plantain which were inserted into agar blocks and then reared under long day conditions for 8 days. The wing development was monitored daily. The total DNA was extracted from the aphid and used for the virus detection by qPCR.

<sup>†</sup> The levels of the DpIDNV DNA accumulation in individual aphids was quantified by real-time PCR.
